# Supplementary material for: Kinetics and mechanism for reduction of oral anticancer platinum(IV) dicarboxylate compounds by L-ascorbate ions †
Source: Royal Society of Chemistry journal article supplement (doi:10.1039/a909484i), 2000-01-01
Supplement: a909484i.doc [file a909484i.doc]

Supporting information to:

Kinetics and mechanism for reduction of oral anticancer platinum(IV) dicarboxylate compounds by L-ascorbate ions

Kelemu Lemma,*a, c* Alan M. Sargeson,b and Lars I. Eldingc ***

*a Inorganic Chemistry 1, Chemical Center, Lund University, P. O. Box 124, SE-221 00 Lund, Sweden, b Research School of Chemistry, A. N. U., Canberra ACT 0200, Australia, c Department of Chemistry, Addis Ababa University, P. O. Box 1176, Addis Ababa, Ethiopia*

# Synopsis

Ascorbate reduction of *cis,trans,cis*-[PtCl2(OAc)2(cha)(NH3)] (JM216) and *cis*,*trans*,*cis*-[PtCl2(OCOC3H7)2(cha)(NH3)] (JM221) takes place *via* an outer-sphere mechanism, whereas *trans,cis,cis*-[PtCl2(OAc)2(cha)(NH3)] (JM394) and *trans,trans,trans*-[PtCl2(OAc)2(cyclohexylamine)(NH3)] (JM576) undergo reductive elimination involving attack on co-ordinated chloride by ascorbate leading to formation of a chloride-bridged transition state.

**Figure S1** Proton NMR spectra of JM576 (b) and JM216 (d) and their products for reduction by ascorbic acid (a) and (c), respectively, all recorded at 25 oC

**Figure S2** Proton NMR spectra of a mixture of 2 mM JM576 and 200 mM chloride recorded after 1.5 h (a) and 72 h (b) at room temperature
